# Supplementary material for: Irreversibility of arsenic trioxide induced PML/RARα fusion protein solubility changes
Source: Royal Society of Chemistry journal article supplement (doi:10.1039/c9mt00220k), 2019-01-01
Supplement: c9mt00220k1.pdf [file c9mt00220k1.pdf]

Figure S1

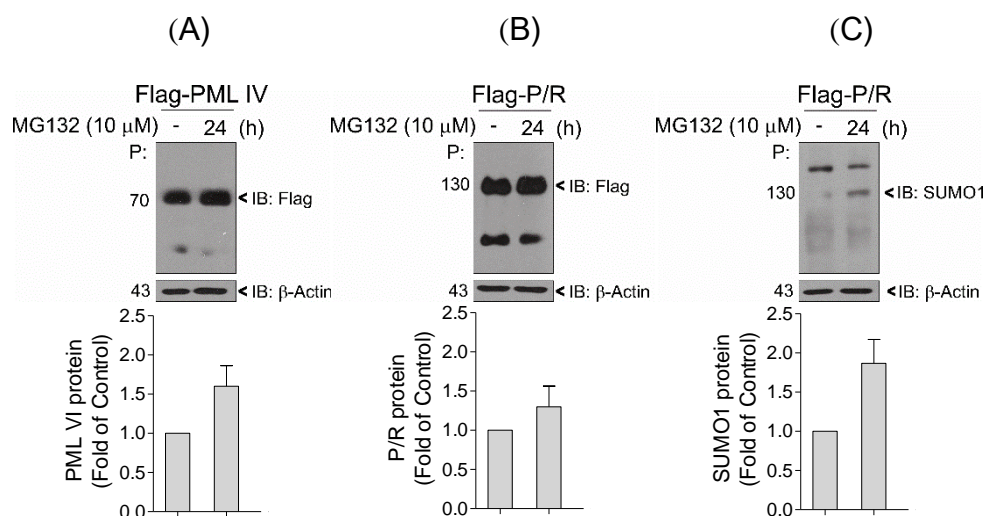

**Figure S1. Effects of MG132 on PML, P/R and SUMO1 proteins.** 293T cells were transfected with indicated expression vectors. 24 h after transfection, cells were treated with MG132 for 24 h. Changes of indicated proteins in pellet fraction were analyzed by western blot and quantified by image J software after 3 independent experiments.
